# Supplementary material
Source: MDPI journal article supplement (https://www.mdpi.com/2673-8007/4/2/55)
Supplement: s1 [file s1]

**Table S1.** Biological assets registered and used to control insects and diseases and their respective dosage per hectare according to the biological target.

| Active ingredient                                      | Biological Targets                                                     | Dosage per hectare |
|--------------------------------------------------------|------------------------------------------------------------------------|--------------------|
| <i>Beauveria bassiana</i> , R444                       | Whitefly ( <i>Bemisia tabaci</i> , biotipo B)                          | 50 to 200 g/ha     |
|                                                        | The coffee berry borers ( <i>Hypothenemus hampei</i> )                 | 400 to 500 g/ha    |
|                                                        | Two-spotted spider mite ( <i>Tetranychus urticae</i> )                 | 100 to 300 g/ha    |
|                                                        | Maize leafhopper ( <i>Dalbulus maidis</i> )                            | 200 to 500 g/ha    |
| <i>Beauveria bassiana</i> , GHA                        | Whitefly ( <i>Bemisia tabaci</i> )                                     | 75 to 125 g/ha     |
|                                                        | Banana borer ( <i>Cosmopolites sordidus</i> )                          | 5g/bait            |
|                                                        | Maize leafhopper ( <i>Dalbulus maidis</i> )                            | 750 to 1250 g/ha   |
|                                                        | The Asian citrus psyllid ( <i>Diaphorina citri</i> )                   | 500 to 1000 g/ha   |
|                                                        | The eucalyptus snout beetle ( <i>Gonipterus scutellatus</i> )          | 75 to 125 g/ha     |
|                                                        | The coffee berry borers ( <i>Hypothenemus hampei</i> )                 | 100 to 500 g/ha    |
|                                                        | Two-spotted spider mite ( <i>Tetranychus urticae</i> )                 | 100 to 250 g/ha    |
| <i>Beauveria bassiana</i> , PL 63                      | The thrips ( <i>Thrips tabaci</i> )                                    | 500 to 1000 g/ha   |
|                                                        | The coffee berry borers ( <i>Hypothenemus hampei</i> )                 | 0.5 to 0.9 Kg/ha   |
|                                                        | The neotropical brown stink bug ( <i>Euschistus heros</i> )            | 0.75 to 3.0 Kg/ha  |
| <i>Beauveria bassiana</i> , CG 716                     | Whitefly ( <i>Bemisia tabaci</i> )                                     | 0.3 to 1.2 Kg/ha   |
|                                                        | The coffee berry borers ( <i>Hypothenemus hampei</i> )                 | 0.5 to 1.5 L/ha    |
|                                                        | The Asian citrus psyllid ( <i>Diaphorina citri</i> )                   | 0.5 to 2.0 L/ha    |
| <i>Beauveria bassiana</i> , BV13                       | Yerba mate borer ( <i>Hedypathes betulinus</i> )                       | 1.0 L/ha           |
|                                                        | The coffee berry borers ( <i>Hypothenemus hampei</i> )                 | 0.5 to 2.0 L/ha    |
|                                                        | Maize leafhopper ( <i>Dalbulus maidis</i> )                            | 0.25 to 2.0 L/ha   |
|                                                        | Whitefly ( <i>Bemisia tabaci</i> biótipo B)                            | 0.5 to 2.0 L/ha    |
|                                                        | Two-spotted spider mite ( <i>Tetranychus urticae</i> )                 | 0.25 to 2.0 L/ha   |
|                                                        | Cotton boll weevil ( <i>Anthonomus grandis</i> )                       | 0.5 to 2.0 L/ha    |
|                                                        | White cochineal ( <i>Planococcus citri</i> )                           | 1.0 to 2.0 L/ha    |
|                                                        | The fall armyworm ( <i>Spodoptera frugiperda</i> )                     | 1.0 to 2.0 L/ha    |
| The false spider mite ( <i>Brevipalpus phoenicis</i> ) | 0.5 to 2.0 L/ha                                                        |                    |
| <i>Beauveria bassiana</i> , Simbi BB 15                | Maize leafhopper ( <i>Dalbulus maidis</i> )                            | 0.1 to 0.5 L/ha    |
|                                                        | Whitefly ( <i>Bemisia tabaci</i> )                                     | 0.1 to 0.5 L/ha    |
|                                                        | The neotropical brown stink bug ( <i>Euschistus heros</i> )            | 0.2 to 0.35 L/ha   |
|                                                        | The Neotropical green-belly stink bug ( <i>Diceraeus melacanthus</i> ) | 0.2 to 0.35 L/ha   |
|                                                        | The coffee berry borers ( <i>Hypothenemus hampei</i> )                 | 0.2 to 0.3 L/ha    |
|                                                        | Cotton thrips ( <i>Frankliniella schultzei</i> )                       | 100 to 250 mL/ha   |
|                                                        | The boll weevil ( <i>Anthonomus grandis</i> )                          | 250 to 400 mL/ha   |
| Two-spotted spider mite ( <i>Tetranychus urticae</i> ) | 0.25 to 0.5 L/ha                                                       |                    |

|                                          |                                                                                              |                                |
|------------------------------------------|----------------------------------------------------------------------------------------------|--------------------------------|
|                                          | Maize leafhopper ( <i>Dalbulus maidis</i> )                                                  | 50 to 250 g/ha                 |
|                                          | Whitefly ( <i>Bemisia tabaci</i> )                                                           | 50 to 250 g/ha                 |
|                                          | Whitefly ( <i>Bemisia tabaci</i> )                                                           | 100 to 300 mL/ha               |
| <i>Beauveria bassiana</i> , CBMAI 2359   | Maize leafhopper ( <i>Dalbulus maidis</i> )                                                  | 100 to 300 mL/ha               |
|                                          | The Neotropical brown stink bug ( <i>Euschistus heros</i> )                                  | 200 to 300 mL/ha               |
|                                          | The Neotropical green-belly stink bug ( <i>Diceraeus melacanthus</i> )                       | 200 to 300 mL/ha               |
| <i>Beauveria bassiana</i> , PPRI 5339    | The thrips ( <i>Thrips tabaci</i> )                                                          | 1000 to 2000 mL/ha             |
|                                          | Whitefly ( <i>Bemisia tabaci</i> )                                                           | 500 to 2000 mL/ha              |
| <i>Beauveria bassiana</i> , CBMAI 1306   | Cucurbit beetle ( <i>Diabrotica speciosa</i> )                                               | 0.65 L/ha                      |
| <i>Beauveria bassiana</i> , CG 1420      | The sugarcane weevil ( <i>Sphenophorus levis</i> )                                           | 100 to 300 g/ha                |
|                                          | The coffee berry borers ( <i>Hypothenemus hampei</i> )                                       | 75 to 200 g/ha                 |
| <i>Beauveria bassiana</i> , ESALQ 1432   | The Asian citrus psyllid ( <i>Diaphorina citri</i> )                                         | 75 to 150 g/ha                 |
|                                          | Whitefly ( <i>Bemisia tabaci</i> raça B)                                                     | 0.5 Kg/ha                      |
|                                          | Banana borer ( <i>Cosmopolites sordidus</i> ).                                               | 3.4 Kg/ha                      |
|                                          | Two-spotted spider mite ( <i>Tetranychus urticae</i> )                                       | 0.7 Kg/ha                      |
|                                          | Maize leafhopper ( <i>Dalbulus maidis</i> )                                                  | 5.4 Kg/ha                      |
|                                          | The sugarcane weevil ( <i>Sphenophorus levis</i> )                                           | 4.8Kg/ha                       |
| <i>Beauveria bassiana</i> , IBCB 66      | The coffee berry borers ( <i>Hypothenemus hampei</i> ) –<br>Up to 5000 plants                | 1.6 to 3.0 Kg/ha               |
|                                          | The coffee berry borers ( <i>Hypothenemus hampei</i> ) -<br>Between 5000 and 10,000 plants   | 3.0 to 4.3 Kg/ha               |
|                                          | The coffee berry borers ( <i>Hypothenemus hampei</i> ) -<br>Between 10,000 and 15,000 plants | 4.3 to 5.6 Kg/ha               |
|                                          | The coffee berry borers ( <i>Hypothenemus hampei</i> ) -<br>Between 15,000 and 20,000 plants | 5.6 to 6.6 Kg/ha               |
| <i>Isaria fumosorosea</i> , ESALQ – 4778 | The Asian citrus psyllid ( <i>Diaphorina citri</i> )                                         | 200 to 1000 mL/ha              |
|                                          | Whitefly ( <i>Bemisia tabaci</i> )                                                           | 100 to 500 mL/ha               |
| <i>Isaria fumosorosea</i> , ESALQ - 3422 | Whitefly ( <i>Bemisia tabaci</i> raça B)                                                     | 150 to 300 g/ha                |
|                                          | The Asian citrus psyllid ( <i>Diaphorina citri</i> )                                         | 100 to 400 mL/100L of<br>water |
|                                          | White Cochineal ( <i>Planococcus citri</i> )                                                 | 50 to 100 mL/100L of water     |
| <i>Isaria fumosorosea</i> , ESALQ - 1296 | Buckskin ( <i>Phyllocoptruta oleivora</i> )                                                  | 100 to 200 mL/100L of<br>water |
|                                          | Flat mite ( <i>Brevipalpus yothersi</i> )                                                    | 100 to 200 mL/100L of<br>water |
|                                          | Citrus blackfly ( <i>Aleurocanthus woglumi</i> )                                             | 50 to 100 mL/100L of water     |

|                                                 |                                                                                     |                                     |
|-------------------------------------------------|-------------------------------------------------------------------------------------|-------------------------------------|
|                                                 | Citrus Snow Scale ( <i>Unaspis citri</i> )                                          | 100 to 200 mL/100L of water         |
|                                                 | Cotton bollworm ( <i>Helicoverpa armigera</i> )                                     | 1000 to 1500 mL/ha                  |
| <i>Isaria javanica</i> , BV14                   | Whitefly ( <i>Bemisia tabaci</i> raça B)                                            | 0.5 to 2.0 L/ha                     |
|                                                 | The Asian citrus psyllid ( <i>Diaphorina citri</i> )                                | 0.5 to 2.0 L/ha                     |
|                                                 | The fall armyworm ( <i>Spodoptera frugiperda</i> )                                  | 0.5 to 2.0 L/ha                     |
|                                                 | The spittlebug ( <i>Mahanarva fimbriolata</i> )                                     | 1.4 L/ha                            |
| <i>Metarhizium anisopliae</i> (Metsch), IBCB348 | The spittlebug ( <i>Mahanarva fimbriolata</i> )                                     | 0.5 to 1.0 Kg/ha (Sugar cane)       |
|                                                 | The spittlebug ( <i>Mahanarva fimbriolata</i> )                                     | 0.3 to 1.0 Kg/ha (Pasture)          |
|                                                 | Coffee leaf miner ( <i>Leucoptera coffeella</i> )                                   | 0.5 to 2.0 L/ha                     |
| <i>Metarhizium anisopliae</i> , BV12            | The fall armyworm ( <i>Spodoptera frugiperda</i> )                                  | 1.0 to 2.0 L/ha                     |
|                                                 | The sugarcane weevil ( <i>Sphenophorus levis</i> )                                  | 1.0 to 1.5 L/ha                     |
|                                                 | The boll weevil ( <i>Anthonomus grandis</i> )                                       | 1.0 to 1.5 L/ha                     |
|                                                 | Grasshopper leafhopper ( <i>Deois flavopicta</i> )                                  | 1.0 to 2.0 L/ha                     |
| <i>Metarhizium anisopliae</i> , CCT8094         | The spittlebug ( <i>Mahanarva fimbriolata</i> )                                     | Depends on the formulation          |
|                                                 | Grasshopper leafhopper ( <i>Zulia entreriana</i> )                                  |                                     |
|                                                 | Grasshopper leafhopper ( <i>Deois flavopicta</i> )                                  |                                     |
| <i>Metarhizium rileyi</i> , PHP1705             | The fall armyworm ( <i>Spodoptera frugiperda</i> )                                  | 100 to 150 g/ha                     |
| <i>Metarhizium rileyi</i> , CCT7771             | The fall armyworm ( <i>Spodoptera frugiperda</i> )                                  | 1.0 to 2.0 L/ha                     |
| <i>Paecilomyces fumosoroseus</i>                | Whitefly ( <i>Bemisia tabaci</i> raça B)                                            | 0.5 to 1.5 L/ha                     |
|                                                 | Maize leafhopper ( <i>Dalbulus maidis</i> )                                         | 0.5 to 2.0 L/ha                     |
|                                                 | The sugarcane weevil ( <i>Sphenophorus levis</i> )                                  | 1.0 to 3.0 L/ha                     |
| <i>Paecilomyces lilacinus</i> , CCT 7766        | Root-knot nematode ( <i>Meloidogyne incognita</i> )                                 | 1.0 to 4.0 L/ha                     |
|                                                 | Root-knot nematode ( <i>Meloidogyne incognita</i> )                                 | 600 g /ha                           |
|                                                 | Root-knot nematode ( <i>Meloidogyne javanica</i> )                                  | 100 to 250 g/ha                     |
|                                                 | Root-lesion nematode ( <i>Pratylenchus brachyurus</i> )                             | 0.1 to 0.25Kg/100Kg of seed         |
| <i>Paecilomyces lilacinus</i> , UEL Pae 10      | Root-knot nematode ( <i>Meloidogyne incognita</i> )                                 | 0.1Kg /100 Kg of seed               |
|                                                 | Root-knot nematode ( <i>Meloidogyne incognita</i> )                                 | 1 bottle for 15 ha after transplant |
| <i>Paecilomyces lilacinus</i> , CCT 2146        | Root-knot nematode ( <i>Meloidogyne incognita</i> )                                 | 1 bottle for 15 ha after transplant |
|                                                 | <i>Fusarium</i> root rot ( <i>Fusarium solani</i> ) - Tratamentos de sementes       | 100 to 200 mL/100 Kg of seed        |
|                                                 | <i>Fusarium</i> root rot ( <i>Fusarium solani</i> ) - Aplicação no sulco de plantio | 250 to 500 mL/ha                    |
| <i>Trichoderma afroharzianum</i> , Th2RI99      | Charcoal rot ( <i>Macrophomina phaseolina</i> )                                     | 50 to 200 mL/100 Kg of seed         |

|                                              |                                                                                   |                              |
|----------------------------------------------|-----------------------------------------------------------------------------------|------------------------------|
|                                              | Belly rot ( <i>Rhizoctonia solani</i> )                                           | 100 to 200 mL/100 Kg of seed |
|                                              | Cottony soft rot ( <i>Sclerotinia sclerotiorum</i> )                              | 50 to 250 mL/ha              |
| <i>Trichoderma afroharzianum</i> , CEN 287   | Cottony soft rot ( <i>Sclerotinia sclerotiorum</i> )                              | 75 g/ha                      |
|                                              | Belly rot ( <i>Rhizoctonia solani</i> )                                           | 50 g/ha                      |
|                                              | <i>Fusarium</i> basal rot ( <i>Fusarium oxysporum</i> )                           | 50 g/ha                      |
| <i>Trichoderma asperellum</i> , CCT 2165     | <i>Fusarium</i> basal rot ( <i>Fusarium oxysporum</i> f. sp. <i>Lycopersici</i> ) | 0.5 to 2.0 L/ha              |
|                                              | Belly rot ( <i>Rhizoctonia solani</i> )                                           | 0.5 to 2.0 L/ha              |
|                                              | Cottony soft rot ( <i>Sclerotinia sclerotiorum</i> )                              | 1.0 to 2.0 L/ha              |
| <i>Trichoderma asperellum</i> , kd           | Soybean cyst nematode ( <i>Heterodera glycines</i> )                              | 125 to 700 g/ha              |
| <i>Trichoderma asperellum</i> , T 211        | Red root rot ( <i>Fusarium solani</i> f. sp. <i>glycines</i> )                    | 1000 mL/ha                   |
|                                              | Belly rot ( <i>Rhizoctonia solani</i> )                                           | 1000 mL/ha                   |
|                                              | Cottony soft rot ( <i>Sclerotinia sclerotiorum</i> )                              | 1200 mL/ha                   |
|                                              | Cottony soft rot ( <i>Sclerotinia sclerotiorum</i> )                              | 1000 mL/ha                   |
| <i>Trichoderma asperellum</i> , BV10         | Root-lesion nematode ( <i>Pratylenchus brachyurus</i> )                           | 1.0 to 4.0 mL/Kg of seed     |
|                                              | Belly rot ( <i>Rhizoctonia solani</i> )                                           | 100 to 800 mL/ha             |
|                                              | Belly rot ( <i>Rhizoctonia solani</i> ) - Seed treatment                          | 1.0 to 4.0 mL/Kg of seed     |
|                                              | Cottony soft rot ( <i>Sclerotinia sclerotiorum</i> )                              | 100 to 400 mL/ha             |
|                                              | <i>Fusarium</i> basal rot ( <i>Fusarium oxysporum</i> ) - Seed treatment          | 0.5 to 4.0 mL/Kg of seed     |
|                                              | <i>Fusarium</i> basal rot ( <i>Fusarium oxysporum</i> ) - foliar application      | 100 mL/ha                    |
|                                              | Charcoal rot ( <i>Macrophomina phaseolina</i> )                                   | 100 mL/ha                    |
|                                              | Charcoal rot ( <i>Macrophomina phaseolina</i> ) - Seed treatment                  | 1.0 to 2.0 mL/Kg of seed     |
| <i>Trichoderma asperellum</i> , CBMAI 1622   | Cottony soft rot ( <i>Sclerotinia sclerotiorum</i> )                              | 1250 g/ha                    |
| <i>Trichoderma asperellum</i> , URM-5911     | <i>Rhizoctonia solani</i> - Cotton                                                | 9.3 g/Kg of seed             |
|                                              | <i>Rhizoctonia solani</i> - Bean                                                  | 4.6 g/Kg of seed             |
|                                              | <i>Fusarium solani</i> f. sp. <i>phaseoli</i>                                     | 2.5 g/Kg of seed             |
| <i>Trichoderma atroviride</i> , 77B          | Cottony soft rot ( <i>Sclerotinia sclerotiorum</i> )                              | 50 to 300 g/ha               |
| <i>Trichoderma endophyticum</i> , IBCB 56/12 | Root-knot nematode ( <i>Meloidogyne incognita</i> )                               | 1.5 to 2.0 g/Kg of seed      |
|                                              | Root-lesion nematode ( <i>Pratylenchus brachyurus</i> )                           | 1.5 to 2.0 g/Kg of seed      |
|                                              | Soybean cyst nematode ( <i>Heterodera glycines</i> )                              | 1.5 to 2.0 g/Kg of seed      |
| <i>Trichoderma hamatum</i> , SYM37537        | Root rot and seedling blight ( <i>Fusarium verticillioides</i> )                  | 0.27 to 0.75 g/Kg of seed    |
|                                              | <i>Fusarium</i> root rot ( <i>Fusarium solani</i> )                               | 0.36 to 0.75 g/Kg of seed    |
|                                              | Charcoal rot ( <i>Macrophomina phaseolina</i> )                                   | 0.36 to 0.75 g/Kg of seed    |

|                                            |                                                                          |                                                |
|--------------------------------------------|--------------------------------------------------------------------------|------------------------------------------------|
|                                            | Root and stem rot of soybean ( <i>Phytophthora sojae</i> )               | 0.36 to 1.00 g/Kg of seed                      |
|                                            | Belly rot ( <i>Rhizoctonia solani</i> )                                  | 0.27 to 0.75 g/Kg of seed                      |
|                                            | Cottony soft rot ( <i>Sclerotinia sclerotiorum</i> )                     | 0.27 to 0.75 g/Kg of seed                      |
|                                            | Ear rot of maize ( <i>Stenocarpella maydis</i> )                         | 0.36 to 1.00 g/Kg of seed                      |
| <i>Trichoderma harzianum</i> , IBLF 006    | Cottony soft rot ( <i>Sclerotinia sclerotiorum</i> )                     | 0.15 to 0.25 Kg/ha                             |
|                                            | Belly rot ( <i>Rhizoctonia solani</i> )                                  | 0.04 to 0.06/100 Kg of seed                    |
|                                            | Charcoal rot ( <i>Macrophomina phaseolina</i> )                          | 0.04 to 0.06/100 Kg of seed                    |
| <i>Trichoderma harzianum</i> , IB19/17     | Cottony soft rot ( <i>Sclerotinia sclerotiorum</i> )                     | Depends on the formulation                     |
|                                            | Cottony soft rot ( <i>Sclerotinia sclerotiorum</i> )                     | 1.0 to 1.5 Kg /ha                              |
|                                            | <i>Fusarium</i> basal rot ( <i>Fusarium oxysporum f.sp.lycopersici</i> ) | 1.0 to 1.5 Kg/ha                               |
| <i>Trichoderma harzianum</i> , T-22        | Root-lesion nematode ( <i>Pratylenchus brachyurus</i> )                  | 0.20 to 0.30 Kg/100 Kg of seed                 |
|                                            | Charcoal rot ( <i>Macrophomina phaseolina</i> )                          | 0.20 to 0.30 Kg/100 Kg of seed                 |
|                                            | Belly rot ( <i>Rhizoctonia solani</i> )                                  | 100 to 400g /100Kg of seed                     |
|                                            | Root and stem rot of soybean ( <i>Phytophthora sojae</i> )               | 100 to 500g/100Kg of seed                      |
|                                            | <i>Fusarium</i> root rot ( <i>Fusarium solani</i> )                      | 100 to 400g/100Kg of seed                      |
| <i>Trichoderma harzianum</i> , ESALQ-1306  | Charcoal rot ( <i>Macrophomina phaseolina</i> )                          | 100 to 500g/100Kg of seed or 100 to 500g/ha    |
|                                            | Root-lesion nematode ( <i>Pratylenchus brachyurus</i> )                  | 100 to 400g/100Kg or                           |
|                                            | Root-knot nematode ( <i>Meloidogyne incognita</i> )                      | 100 to 500g/100Kg of seed                      |
|                                            | Soybean cyst nematode ( <i>Heterodera glycines</i> )                     |                                                |
|                                            |                                                                          | 200 to 400 mL/100 Kg                           |
|                                            | Belly rot ( <i>Rhizoctonia solani</i> )                                  | 100 to 500g for 100Kg of seed (Seed treatment) |
|                                            |                                                                          | 1,5 to 2,5 L/ha (applied to the soil)          |
| <i>Trichoderma harzianum</i> , CCT 7589    |                                                                          | 200 to 400 mL/100 Kg 100 a                     |
|                                            |                                                                          | 500g for 100Kg of seed                         |
|                                            | Cottony soft rot ( <i>Sclerotinia sclerotiorum</i> )                     | (Seed treatment)                               |
|                                            |                                                                          | 1.5 to 2.5 L/ha (applied to the soil)          |
| <i>Trichoderma harzianum</i> , T78         | Cottony soft rot ( <i>Sclerotinia sclerotiorum</i> )                     | 2.0 to 3.0 L/ha                                |
| <i>Trichoderma harzianum</i> , 6550        | Cottony soft rot ( <i>Sclerotinia sclerotiorum</i> )                     | 1 bottle/15 ha                                 |
| <i>Trichoderma harzianum</i> , BRM 29600   | Cottony soft rot ( <i>Sclerotinia sclerotiorum</i> )                     | 100 to 400g/ha                                 |
| <i>Trichoderma koningiopsis</i> , CCT 2142 | <i>Fusarium</i> basal rot ( <i>Fusarium oxysporum</i> )                  | 1 bottle of 60 mL/15 ha                        |

|                                                                                                                                                                                   |                                                              |                             |
|-----------------------------------------------------------------------------------------------------------------------------------------------------------------------------------|--------------------------------------------------------------|-----------------------------|
| <i>Trichoderma reesei</i> , CCT 2768                                                                                                                                              | <i>Fusarium</i> basal rot ( <i>Fusarium oxysporum</i> )      | 1 bottle /5 ha              |
| <i>Trichoderma stromaticum</i> , CEPLAC                                                                                                                                           | Cacao witches ( <i>Moniliophthora perniciosa</i> )           | -                           |
| <i>Clonostachys rosea</i> , CPQBA 040-11 DRM 07                                                                                                                                   | Grey mould-rot ( <i>Botrytis cinerea</i> )                   | 300 to 600 g/ha             |
| <i>Cordyceps javanica</i> , BRM 27666                                                                                                                                             | Whitefly ( <i>Bemisia tabaci</i> )                           | 100 to 200 g/ha             |
| <i>Bacillus amyloliquefaciens</i> , CCT 7901 + <i>Trichoderma asperellum</i> URM 8120 + <i>Trichoderma harzianum</i> , URM 8119                                                   | Belly rot ( <i>Rhizoctonia solani</i> )                      | 40 to 60g/100Kg of seed     |
|                                                                                                                                                                                   | Cottony soft rot ( <i>Sclerotinia sclerotiorum</i> )         | 100 to 250g/ha              |
|                                                                                                                                                                                   | Anthracnose of bean ( <i>Colletotrichum lindemuthianum</i> ) | 150 to 250g/ha              |
| <i>Bacillus amyloliquefaciens</i> , SVG-0036-B + <i>Bacillus subtilis</i> , SVG-0037-B + <i>Trichoderma asperellum</i> , SVG-00124-F + <i>Trichoderma harzianum</i> , SVG-00003-F | Belly rot ( <i>Rhizoctonia solani</i> )                      | 5 to 25 g/ha                |
| <i>Bacillus licheniformis</i> , ATCC 12713 + <i>Bacillus subtilis</i> , ATCC 6051 + <i>Paecilomyces lilacinus</i> ( <i>Purpureocillium lilacinum</i> ), CPQBA 040-11 DRM 10       | Root-knot nematode ( <i>Meloidogyne incognita</i> )          | 50 to 250 g/ha              |
|                                                                                                                                                                                   | Root-lesion nematode ( <i>Pratylenchus brachyurus</i> )      | 90 to 200 g /100 Kg of seed |
| <i>Bacillus thuringiensis</i> , S 234 + <i>Metarhizium rileyi</i> , CG 1153                                                                                                       | Soybean caterpillar ( <i>Anticarsia gemmatalis</i> )         | 70 to 300 g/ha              |
|                                                                                                                                                                                   | Soybean looper ( <i>Chrysodeixis includens</i> )             |                             |
|                                                                                                                                                                                   | Cotton bollworm ( <i>Helicoverpa armigera</i> )              | 25 to 300 g/ha              |
|                                                                                                                                                                                   | The black army worm ( <i>Spodoptera cosmioides</i> )         |                             |
|                                                                                                                                                                                   | Southern armyworm ( <i>Spodoptera eridania</i> )             |                             |
| <i>Beauveria bassiana</i> , IBCB 66 + <i>Metarhizium anisopliae</i> , IBCB 425                                                                                                    | The fall armyworm ( <i>Spodoptera frugiperda</i> )           | 70 to 300 g/ha              |
|                                                                                                                                                                                   | Grasshopper leafhopper ( <i>Deois flavopicta</i> )           | Depends on the formulation  |
|                                                                                                                                                                                   | The neotropical brown stink bug ( <i>Euschistus heros</i> )  |                             |
| <i>Beauveria bassiana</i> , BALL 6-2 + <i>Isaria javanica</i> , URM 7662                                                                                                          | Whitefly ( <i>Bemisia tabaci</i> raça B)                     | 200 to 350 g/ha             |
|                                                                                                                                                                                   | The Asian citrus psyllid ( <i>Diaphorina citri</i> )         | 600 to 1000 g/ha            |
|                                                                                                                                                                                   | Citrus Snow Scale ( <i>Unaspis citri</i> )                   | 200 to 1000 g/ha            |
|                                                                                                                                                                                   | Maize leafhopper ( <i>Dalbulus maidis</i> )                  | 300 to 500 g/ha             |
| <i>Bacillus subtilis</i> , CCT 0480 + <i>Trichoderma harzianum</i> , CCT 2160                                                                                                     | Root-knot nematode ( <i>Meloidogyne incognita</i> )          | 100 to 350 mL/ha            |
|                                                                                                                                                                                   | Belly rot ( <i>Rhizoctonia solani</i> )                      | 90 to 250 g/100 Kg of seed  |
| <i>Bacillus velezensis</i> , CBMAI 1301+ <i>Bacillus velezensis</i> , CBMAI 1304 + <i>Trichoderma harzianum</i> , CPQBA 040-11DRM 09                                              | Belly rot ( <i>Rhizoctonia solani</i> )                      | 1.5 to 2.5 Kg/ha            |
|                                                                                                                                                                                   | <i>Fusarium</i> root rot ( <i>Fusarium solani</i> )          | 50 to 300g/ 100Kg of seed   |
|                                                                                                                                                                                   | Cottony soft rot ( <i>Sclerotinia sclerotiorum</i> )         | 300 to 600 g/ha             |
|                                                                                                                                                                                   | Charcoal rot ( <i>Macrophomina phaseolina</i> )              | 75 to 100 g/ha              |
|                                                                                                                                                                                   | Black rot of pineapple ( <i>Ceratocystis paradoxa</i> )      | 250 to 500 g/ha             |
| <i>Trichoderma harzianum</i> , IBLF1278 + <i>Trichoderma harzianum</i> , IBLF1282 + <i>Trichoderma viride</i> , IBLF1275 + <i>Trichoderma viride</i> , IBLF1276                   | Belly rot ( <i>Rhizoctonia solani</i> )                      | Depends on the formulation  |
|                                                                                                                                                                                   | <i>Fusarium</i> basal rot ( <i>Fusarium oxysporum</i> )      |                             |

Source: Agrofite (2024)
